# Supplementary material for: Electrosorption of LiCl in different solvents by carbon nanotube film electrodes
Source: Royal Society of Chemistry journal article supplement (doi:10.1039/c3ra42961j), 2013-01-01
Supplement: c3ra42961j.pdf [file c3ra42961j.pdf]

## Electrosorption of LiCl in different solvents by carbon nanotubes film electrodes

*Yong Liu, Likun Pan\*, Xingtao Xu, Ting Lu, Zhuo Sun*

Engineering Research Center for Nanophotonics & Advanced Instrument,  
Ministry of Education, Department of Physics, East China Normal University,

Shanghai 200062, China

\*lkpan@phy.ecnu.edu.cn

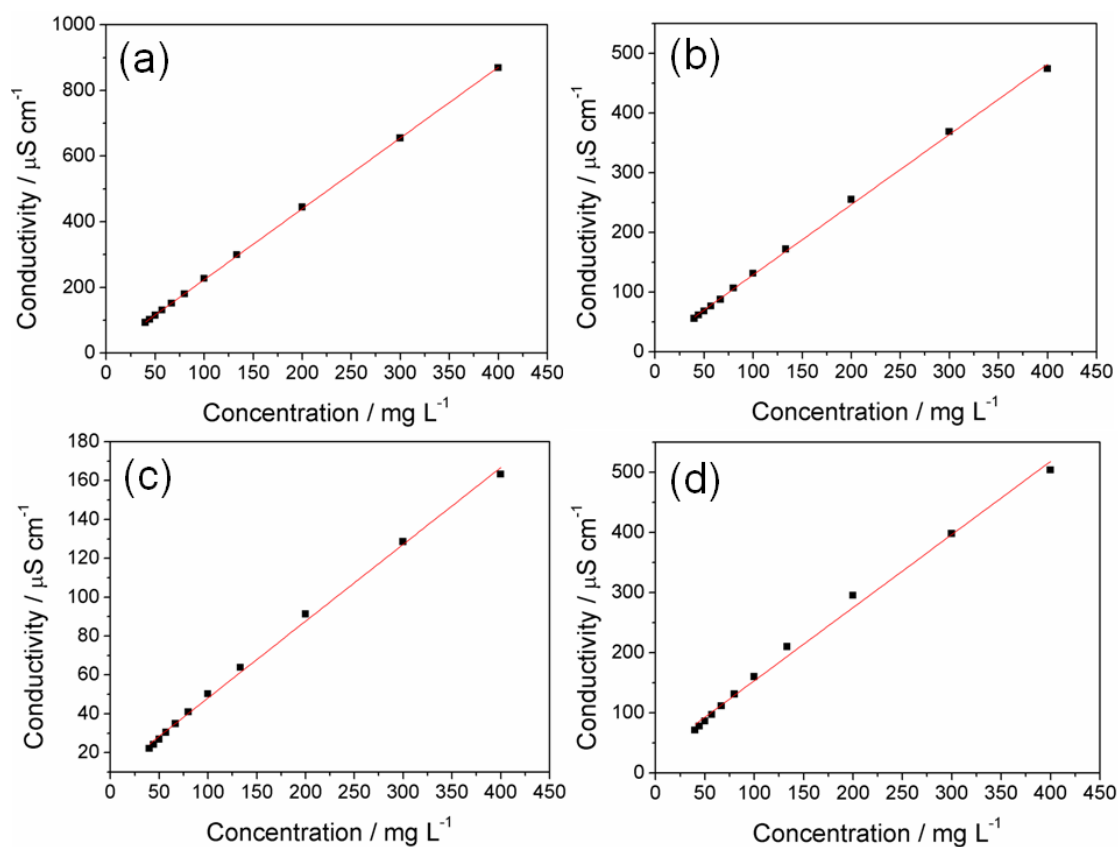

Fig. S1 The relationship between conductivity and LiCl concentration in (a) water (b) methanol (c) ethanol (d) DMF solutions.

Fig. S1(a)-(d) show the relationship between solution conductivity  $z$  ( $\mu\text{S cm}^{-1}$ ) and LiCl concentration  $C$  ( $\text{mg L}^{-1}$ ) in water, methanol, ethanol and DMF solutions, respectively. It can be seen that the relationship follows the linear plot based on the following equations:

Water:  $z = 2.158 \times C + 0.816$  (regression coefficient  $R^2 = 0.999$ )

Methanol:  $z = 1.177 \times C + 11.566$  ( $R^2 = 0.998$ )

Ethanol:  $z = 0.395 \times C + 8.649$  ( $R^2 = 0.997$ )

DMF:  $z = 1.216 \times C + 32.118$  ( $R^2 = 0.994$ )
